BNP values (NTpro-BNP/EVF) were during the 1st trimester 19% higher, during the 2nd trimester 9% and peri-partum 40% higher than post-partum levels. Troponin T levels were above our institutions cut off values of 14 ng/L in 2.5% of peri-partum and in 0.9% in post-partum measurements. The four patients with TNT above the upper limit were asymptomatic.

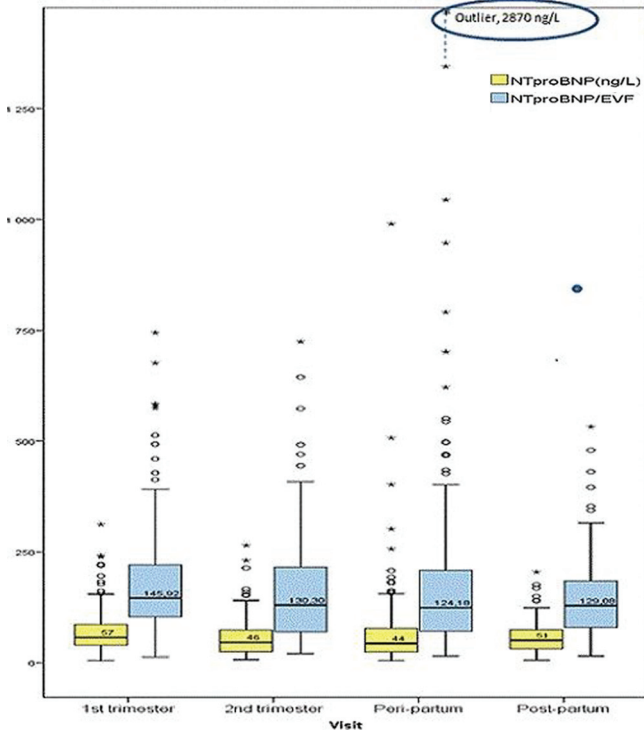

NTpro-BNP during and after pregnancy

**Conclusion:** NTpro-BNP levels are increased during pregnancy and peri-partum period compared to post-partum, especially when adjusted for hematocrit, but can still be used to discriminate against heart failure during pregnancy. Troponin T cut-off value of >14 ng/L were found in 2.5% of healthy pregnant women.

**Funding Acknowledgements:** Supported by ALF-LUA funds, Sahlgrenska University Hospital and the Swedish Heart and Lung Foundation

**P3468**

**What we learned from the analysis of first 301 patients from the Turkish Peripartum Cardiomyopathy Registry?**

M. Kayikcioglu<sup>1</sup>, L. Tokgozoglu<sup>2</sup>, M. Biteker<sup>3</sup>, M.A. Akil<sup>4</sup>, F. Ertas<sup>4</sup>, S. Nalbantgil<sup>1</sup>, E. Yilmaz<sup>5</sup>, D.C. Yilmaz<sup>6</sup>, L. Askin<sup>7</sup>, L.D. Asarcikli<sup>8</sup>, F.O. Mutluer<sup>9</sup>, D. Ural<sup>9</sup>, A. Temizhan<sup>10</sup>. <sup>1</sup>Ege University, Faculty of Medicine, Izmir, Turkey; <sup>2</sup>Hacettepe University, Cardiology, Ankara, Turkey; <sup>3</sup>Sitki Kocman University, School of Medicine, Cardiology, Mugla, Turkey; <sup>4</sup>Diyarbakir University Hospital, Cardiology, Diyarbakir, Turkey; <sup>5</sup>Mehmet Akif Ersoy Thoracic and Cardiovascular Surgery Training and Research Hospital, Cardiology, Istanbul, Turkey; <sup>6</sup>Mersin University, Cardiology, Mersin, Turkey; <sup>7</sup>Adiyaman University Training and Research Hospital, Cardiology, Adiyaman, Turkey; <sup>8</sup>Dr. Siyami Ersek Thoracic and Cardiovascular Surgery Center, Cardiology, Istanbul, Turkey; <sup>9</sup>Koc University, Cardiology, Istanbul, Turkey; <sup>10</sup>Turkiye Yuksek Ihtisas Hospital, Cardiology, Ankara, Turkey. On behalf of ARTEMIS 1 Investigators

**Background:** Peripartum cardiomyopathy (PPCM) is the major cause of acute heart failure in the peripartum period. ARTEMIS-1 is a retrospective registry conducted with the aim of providing insight to the real-world management of PPCM in Turkey.

**Methods:** 301 patients with the diagnosis of PPCM during the last 5 years, were

retrospectively enrolled from 44 centers. Participating centers provided patient information including presentation, co-morbidities, diagnosis, family history, treatment patterns, relevant laboratory values, and in-hospital and 1 year outcomes via a standard questionnaire.

**Results:** The mean age was 30±7 years. 6.8% were diabetic and 12.3% patients had a hypertensive disorder. Presenting symptom was dyspnea in 94%. In 73% the symptoms were initiated in postpartum period. Drug therapy initiated included mineralocorticoid receptor antagonists (52%), beta-blockers (98%) and inotropics (16%). Bromocriptine was only used in 6.4%. In-hospital mortality was 6.84%. Neonatal death rate was 4.6%. Long-term follow-up was available in 81% for 1 year. 3 patients were died during follow-up and complete recovery was afforded in 35%. Recovery was associated with left ventricular (LV) ejection fraction (EF), LV end-diastolic size, right ventricular EF, systolic pulmonary arterial pressure, age at diagnosis, CRP and haemoglobin levels, and systolic blood pressure.

**Conclusion:** The prevalence of PPCM might be high in Turkey. Use of bromocriptine is extremely low (6.4%). Late recovery rate is 35%. Knowledge and awareness of both the diagnosis and management should be increased among cardiologists.

**Funding Acknowledgements:** Turkish Society of Cardiology

**P3469**

**Implantable cardiac defibrillators (icd) in pregnancy. Are they safe?**

P. Jorda<sup>1</sup>, L. Salazar<sup>2</sup>, F. Crispi<sup>2</sup>, J.M. Tolosana<sup>1</sup>, A. Garcia-Alvarez<sup>1</sup>, F. Figueras<sup>2</sup>, L.L. Mont<sup>1</sup>, M. Lopez<sup>2</sup>, E. Arbelo<sup>1</sup>. <sup>1</sup>Hospital Clinic de Barcelona, Cardiology Department, Institut Clínic Cardiovascular, Universitat de Barcelona, Barcelona, Spain; <sup>2</sup>Hospital Clinic de Barcelona, Department of Maternal-Fetal Medicine, Hospital Clinic and Hospital Sant Joan de Déu, Barcelona, Spain

**Background:** Clinical impact of ICD in pregnant women has not been yet well described. Only few series in literature are available.

**Objective:** Describe the prognostic significance of ICD in pregnant women with cardiac disease.

**Methods:** Between June 2011 and November 2017, we prospectively included all consecutive pregnant women with heart disease in our centre. We analysed pregnancy and delivery characteristics in 8 women with an ICD.

**Results:** A total of 17 pregnancies in 8 patients with ICD already implanted were followed-up. Two pregnancies were voluntarily interrupted in first trimester, one due to positive genetic diagnosis in foetus, in case 1, and the second one because of high risk of maternal mortality, in case 6. Six first trimester miscarriages and one second trimester pregnancy loss occurred. Preterm birth occurred in one patient (12.5%). Median gestational age at birth was 39,2 weeks (range 29,6-40,3). A 12.5% of new-borns were small for gestational age (birth weight <10th centile). One patient, case 4, who had left ventricular ejection fraction of 15%, developed heart failure decompensation and runs of non-sustained VT, elective caesarean after pulmonary foetus maturation was performed at 29th week. One isolated discharge occurred (case 8): an inappropriate discharge in first trimester due to lead dysfunction that required lead replacement in the second trimester, with no adverse repercussion in foetal or mother's outcomes. In this patient, ICD was implanted for secondary prevention.

**Conclusion:** Pregnancy in women with ICD is apparently safe for both, mother and foetus. Foetus and mother morbimortality depend more on the underlying heart disease rather than the presence of an ICD.

**P3470**

**Elevated plasma levels of galactin-3 in women with gestational diabetes mellitus, a new surrogate for cardiovascular disease in women?**

Y. Talmor-Barkan, C. Chezar-Azerrad, D. Leshem-Lev, E. Hadar, R. Kornowski, A. Porter. Rabin Medical Center, Cardiology, Petah Tikva, Israel

**Background:** Gestational diabetes mellitus (GDM) is recognized as a risk factor for cardiovascular disease (CVD) in women, and is related to future major cardiovascular events. Galactin-3 (Gal-3), a glycoprotein secreted by activated cardiac macrophages, has a role in atherogenesis through several pathways. Increased levels of Gal-3 above 8.7ng/mL has been found to be an independent predictor of increased mortality after cardiac injury. Protein convertase subtilisin/kexin type 9 (PCSK-9), a novel target for low-density lipoprotein (LDL) cholesterol reduction, is associated with metabolic disorders in young women.

Abstract P3469 – Table 1

| Patient | Under-lying cardiac disease | Secondary prevention or therapies before pregnancy | LVEF (%) | Age at ICD implant (years) | Age at first conception (years) | Number of pregnancies | ICD therapies during pregnancy | Abortion or preterm births | Treatment                                                   |
|---------|-----------------------------|----------------------------------------------------|----------|----------------------------|---------------------------------|-----------------------|--------------------------------|----------------------------|-------------------------------------------------------------|
| 1       | ARVC                        | No                                                 | 60       | 31                         | 29                              | 5 (1 interrupted)     | 0                              | 4 miscarriages             | None                                                        |
| 2       | BS                          | No                                                 | 60       | 37                         | 31                              | 1                     | 0                              | None                       | None                                                        |
| 3       | LQTS                        | Yes                                                | 60       | 23                         | 28                              | 1                     | 0                              | None                       | Bisoprolol                                                  |
| 4       | CHD                         | No                                                 | 15       | 27                         | 32                              | 1                     | 0                              | Preterm (29 weeks)         | Acenocoumarol                                               |
| 5       | HCM                         | No                                                 | 60       | 22                         | 27                              | 2                     | 0                              | 2nd trimester foetus loss  | Bisoprolol                                                  |
| 6       | IHD                         | No                                                 | 30       | 38                         | 37                              | 1 (interrupted)       | 0                              | None                       | Acetylsalicylic Acid, Bisoprolol, Enalapril, Spironolactone |
| 7       | CPVT                        | Yes                                                | 60       | 16                         | 26                              | 5                     | Yes                            | 2 miscarriages             | Labeltalol                                                  |
| 8       | LQTS                        | Yes                                                | 60       | 26                         | 33                              | 1                     | 0                              | None                       | Bisoprolol (Peripartum)                                     |

ARVC: Arrhythmogenic right ventricular cardiomyopathy; BS: Brugada Syndrome; HCM: Hypertrophic cardiomyopathy; LQTS: Long QT syndrome; CHD: Congenital Heart Disease; IHD: ischemic heart disease; CPVT: Catecholaminergic Polymorphic Ventricular Tachycardia; LVEF: Left Ventricular Ejection Fraction.
